# Supplementary material for: A ball-milling synthesis of N-graphyne with controllable nitrogen doping sites for efficient electrocatalytic oxygen evolution and supercapacitors
Source: Royal Society of Chemistry journal article supplement (doi:10.1039/d0dt01855d), 2020-01-01
Supplement: d0dt01855d1.pdf [file d0dt01855d1.pdf]

## Supplementary Data

### **Ball-milling synthesis of N-graphyne with controllable nitrogen doping sites for efficient electrocatalytic oxygen evolution and supercapacitor**

**Wen Ding <sup>a</sup>, Mingxuan Sun <sup>a,b\*</sup>, Bowen Gao <sup>a</sup>, Wenzhu Liu <sup>a</sup>, Zhipeng Ding <sup>a</sup>, Sambandam Anandan <sup>c</sup>**

*<sup>a</sup>School of Materials Engineering, Shanghai University of Engineering Science, Shanghai 201620, China*

*<sup>b</sup>State Key Laboratory of Photocatalysis on Energy and Environment, Fuzhou University, Fuzhou, 350002, P. R. China*

*<sup>c</sup>Nanomaterials and Solar Energy Conversion Lab, Department of Chemistry, National Institute of Technology, Tiruchirappalli 620 015, India*

**\*Corresponding author: Prof. Mingxuan Sun**

**School of Materials Engineering, Shanghai University of Engineering Science, Shanghai 201620 (China)**

**E-mail: [mingxuansun@sues.edu.cn](mailto:mingxuansun@sues.edu.cn); [smxalan@163.com](mailto:smxalan@163.com)**

**Tel.: +86 21 67791208**

**Fax: +86 21 67791207**

## Table of contents

### 1. Calculation

1) The calculated process of electrochemical surface area

2) The calculation of Gibbs free energy change

### 2. Characterization

**Figure S1.** Cyclic voltammetry (CV) curves of graphene (GE),  $\gamma$ -graphyne (GY), and N-graphyne (N-GY) with different scan rates (10-90 mV/s) in the region of 0.30-0.40 V (vs. Hg/HgO)

**Table S1** Electrocatalysts for OER

**Table S2** Supercapacitor electrode materials

**Table S3** The fitting results of EIS spectra

## 1. Calculation

### 1) The calculated process of electrochemical surface area:

The electrochemical surface area (ECSA) is calculated by the measured double layer capacitance ( $C_{dl}$ ) of the catalysts surface. In a typical procedure, a potential range in which no apparent Faradaic processes happened was determined from static CV. All measured current in this non-Faradaic potential region is hypothesized to be owing to double-layer charging. The charging current  $i_c$  was measured from the CVs at different scan rates, as displayed in Figure S1. The relation between  $i_c$ ,  $C_{dl}$ , and scan rate ( $v$ ) is as follows ,

$$i_c = vC_{dl}$$

Hence, the slope of  $i_c$  as a function of  $v$  gives a straight line with a slope equal to  $C_{dl}$  (Figure 4d).

The ECSA of a catalyst sample is calculated from the  $C_{dl}$  according to the equation,

$$ECSA = \frac{C_{dl}}{C_s}$$

where  $C_s$  is the specific capacitance of the sample. The  $C_s$  is equal to 0.040 mF  $cm^{-2}$  in 1 M KOH according to the previous reports.

## 2) The calculation of Gibbs free energy change:

The thermodynamic feasibility for the synthesis of N-graphyne using CaC<sub>2</sub> and Pyrazine is examined by the calculation of Gibbs free energy change. One molecule (N) N-graphyne and 2N CaH<sub>2</sub> formed by N pyrazine molecule and 2N CaC<sub>2</sub> are supposed as a model. Moreover, E, N, and N<sub>A</sub> represent the bond energy of chemical bond, the number of atoms, and avogadro constant, respectively.

Enthalpy change:

$$\begin{aligned}
 \Delta H &= H_{N\text{-graphyne}} - H_{\text{pyrazine}} - H_{\text{CaC}_2} + H_{\text{CaH}_2} \\
 &= \frac{6N}{N_A} (E_{\text{pyrazine}} + E_{\text{C-C}} - E_{\text{pyrazine}} - E_{\text{C-H}}) + \frac{3N}{N_A} (\Delta H_{\text{CaH}_2} - \Delta H_{\text{CaC}_2}) \\
 &= \frac{4N}{N_A} (332 - 414) + \frac{2N}{N_A} (-181.5 + 62.8) \\
 &= -565.4 \frac{N}{N_A} \text{ KJ}
 \end{aligned}$$

This reaction is an exothermic reaction.

Entropy change:

$$\begin{aligned}
 \Delta S &= S_{N\text{-graphyne}} - S_{\text{pyrazine}} + S_{\text{CaH}_2} - S_{\text{CaC}_2} + \Delta S_{\text{mix}} \\
 &= \frac{1}{N_A} \Delta_f S_{N\text{-graphyne}} - \frac{N}{N_A} \Delta S_{\text{pyrazine}} + 2 \frac{N}{N_A} (\Delta S_{\text{CaH}_2} - \Delta S_{\text{CaC}_2}) + \Delta S_{\text{mix}} \\
 &= \frac{1}{N_A} \Delta S_{N\text{-graphyne}} - \frac{N}{N_A} \Delta S_{\text{pyrazine}} + 2 \frac{N}{N_A} (41.4 - 70.3) + \Delta S_{\text{mix}} \\
 &= \frac{1}{N_A} \Delta S_{N\text{-graphyne}} - 61 \frac{N}{N_A} + \Delta S_{\text{mix}} \text{ (J / K)}
 \end{aligned}$$

Thereinto,

$$\Delta S_{\text{mix}} = k \ln \frac{(3N+1)!}{3N!} - k \ln \frac{(N+3N)}{(3N)! \cdot N!} = k \ln(3N+1) - \ln \frac{4^4}{3^3} \ln(J / K)$$

Gibbs free energy change:

$$\Delta G = \Delta H - T\Delta S$$

$$= -565400 \frac{N}{N_A} - \frac{T}{N_A} \Delta S_{N\text{-graphyne}} + 61 \frac{N}{N_A} + kT \ln(3N+1) - \ln \frac{4^4}{3^3} KNT$$

$$= -\frac{T}{N_A} \Delta S_{N\text{-graphyne}} - kT \ln(3N+1) - kN \left( \frac{565400}{R} - \frac{61T}{R} - \ln \frac{4^4}{3^3} T \right)$$

Thereinto:

$$-\frac{T}{N_A} \Delta S_{N\text{-graphyne}} < 0$$

$$-kT \ln(3N+1) < 0$$

When  $T < 9000$  K,

$$-kN \left( \frac{565400}{R} - \frac{61T}{R} - \ln \frac{4^4}{3^3} T \right) < 0$$

That is  $\Delta G < 0$ .

Thus, the reaction should be a spontaneous process in common temperature.

## 2. Characterization

Figure S1

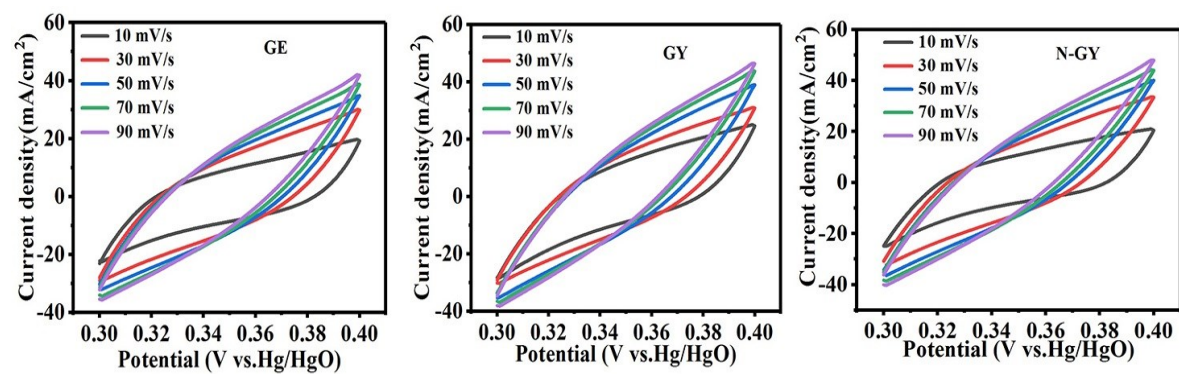

**Figure S1.** Cyclic voltammetry (CV) curves of graphene (GE),  $\gamma$ -graphyne (GY), and N-graphyne (N-GY) with different scan rates (10-90 mV/s) in the region of 0.30-0.40 V (vs. Hg/HgO)

**Table S1** Electrocatalysts for OER

| <b>Electrocatalysis materials</b>                                      | <b>Electrolyte</b> | <b>Current density</b> | <b>Overpotential (mV)</b> | <b>Tafel slope (mV/dec)</b> | <b>References</b> |
|------------------------------------------------------------------------|--------------------|------------------------|---------------------------|-----------------------------|-------------------|
| $\text{Co}_3(\text{OH})_2(\text{HPO}_4)_2/\text{NF}$                   | 1M KOH             | 100 mA/cm <sup>2</sup> | 240                       | 69                          | S1                |
| $\text{Ni}_2\text{P-VP}_2/\text{NF}$                                   | 1M KOH             | 100 mA/cm <sup>2</sup> | 398                       | 49                          | S2                |
| NiTe/NiS                                                               | 1M KOH             | 100 mA/cm <sup>2</sup> | 104                       | 49                          | S3                |
| NdNiO <sub>3</sub>                                                     | 0.1M KOH           | 100 mA/cm <sup>2</sup> | 350                       | 45.9                        | S4                |
| NiCo/NiCo <sub>2</sub> S <sub>4</sub> /NiCo @NF                        | 1M KOH             | 100 mA/cm <sup>2</sup> | 294                       | 60                          | S5                |
| Ni-Fe-OH/Ni <sub>3</sub> S <sub>2</sub> @NF                            | 1M KOH             | 100 mA/cm <sup>2</sup> | 310                       | 93                          | S6                |
| NiFe Nanosheet @NF                                                     | 1M KOH             | 100 mA/cm <sup>2</sup> | 290                       | 52                          | S7                |
| Na <sub>1-x</sub> Ni <sub>y</sub> Fe <sub>1-y</sub> O <sub>2</sub> @NF | 1M KOH             | 100 mA/cm <sup>2</sup> | 290                       | 44                          | S8                |
| NiCoP @NF                                                              | 1M KOH             | 100 mA/cm <sup>2</sup> | 370                       | 116                         | S9                |
| Ni <sub>2</sub> P @NF                                                  | 1M KOH             | 100 mA/cm <sup>2</sup> | 390                       | 85                          | S10               |
| Ni <sub>0.51</sub> Co <sub>0.49</sub> P @NF                            | 1M KOH             | 100 mA/cm <sup>2</sup> | 480                       | 43                          | S11               |

| <b>Electrocatalysis materials</b>            | <b>Electrolyte</b> | <b>Current density</b> | <b>Overpotential (mV)</b> | <b>Tafel slope (mV/dec)</b> | <b>References</b> |
|----------------------------------------------|--------------------|------------------------|---------------------------|-----------------------------|-------------------|
| NiFe-P<br>@NF<br>Ni-Fe/graphene<br>@NF       | 1M KOH             | 100 mA/cm <sup>2</sup> | 240                       | 73                          | S12               |
| CoNiCH<br>@NF                                | 1M KOH             | 100 mA/cm <sup>2</sup> | 104                       | /                           | S14               |
| FeNi <sub>2</sub> S <sub>4</sub> /GO<br>@NF  | 0.1M KOH           | 100 mA/cm <sup>2</sup> | 350                       | 66                          | S15               |
| CoMoNiS<br>@NF                               | 1M KOH             | 10 mA/cm <sup>2</sup>  | 113                       | 58                          | S16               |
| Fe-NiSe <sub>2</sub>                         | 1M KOH             | 100 mA/cm <sup>2</sup> | 350                       | 83                          | S17               |
| Au@Ni <sub>2</sub> P                         | 1M KOH             | 100 mA/cm <sup>2</sup> | 360                       | 50                          | S18               |
| IrO <sub>2</sub> /NiO<br>@NF                 | 1M KOH             | 100 mA/cm <sup>2</sup> | 320                       | 41.8                        | S19               |
| FeOOH/Ni(OH) <sub>2</sub><br>@NF             | 1M KOH             | 100 mA/cm <sup>2</sup> | 250                       | 70                          | S20               |
| NCFO<br>@NF                                  | 1M KOH             | 100 mA/cm <sup>2</sup> | 320                       | 56                          | S21               |
| 3DG-Au-Ni <sub>3</sub> S <sub>2</sub><br>@NF | 1M KOH             | 100 mA/cm <sup>2</sup> | 380                       | 150                         | S22               |
| Ni <sub>7</sub> S <sub>6</sub><br>@NF        | 0.1M KOH           | 30 mA/cm <sup>2</sup>  | 280                       | 119                         | S23               |
| Ni-Tan<br>@NF                                | 1M KOH             | 100 mA/cm <sup>2</sup> | 230                       | 33.5                        | S24               |
| FeOOH/Ni(OH) <sub>2</sub><br>@NF             | 1M KOH             | 100 mA/cm <sup>2</sup> | 250                       | 70                          | S25               |
| WC<br>@NF                                    | 1M KOH             | 100 mA/cm <sup>2</sup> | 400                       | 52                          | S26               |
| NiV LDH                                      | 1M KOH             | 100 mA/cm <sup>2</sup> | 280                       | 55.3                        | S27               |



| <b>Electrocatalysis materials</b>                       | <b>Electrolyte</b> | <b>Current density</b>       | <b>Overpotential (mV)</b> | <b>Tafel slope (mV/dec)</b> | <b>References</b> |
|---------------------------------------------------------|--------------------|------------------------------|---------------------------|-----------------------------|-------------------|
| Ni <sub>5</sub> Co <sub>3</sub> Mo–OH @NF               | 1M KOH             | 100 mA/cm <sup>2</sup>       | 290                       | 56.4                        | S28               |
| CePO <sub>4</sub> /NiCo <sub>2</sub> O <sub>4</sub> @NF | 1M KOH             | 100 mA/cm <sup>2</sup>       | 360                       | 74                          | S29               |
| MnP <sub>x</sub> /MoPy @NF                              | 1M KOH             | 100 mA/cm <sup>2</sup>       | 380                       | 105                         | S30               |
| Co-NiMoN @NF                                            | 1M KOH             | 100 mA/cm <sup>2</sup>       | 380                       | 73                          | S31               |
| NiFe-OH @NF                                             | 1M KOH             | 100 mA/cm <sup>2</sup>       | 228                       | 22.6                        | 32                |
| (Ni,Fe) <sub>3</sub> S <sub>2</sub> /NF @NF             | 1M KOH             | 10 mA/cm <sup>2</sup>        | 246                       | 41                          | S33               |
| NiO/NiS @NF                                             | 1M KOH             | 40 mA/cm <sup>2</sup>        | 200                       | 60                          | S34               |
| FeOOH/NFG @NF                                           | 1M KOH             | 100 mA/cm <sup>2</sup>       | 280                       | 36.2                        | S35               |
| γ-graphyne @NF                                          | 1M KOH             | 100 mA/cm <sup>2</sup>       | 336                       | 130                         | S36               |
| <b>N-graphyne</b>                                       | <b>1M KOH</b>      | <b>100 mA/cm<sup>2</sup></b> | <b>285</b>                | <b>122</b>                  | <b>This work</b>  |

**Table S2** Supercapacitor electrode materials

| <b>Supercapacitor materials</b>           | <b>Scan rate (A/g)</b> | <b>Capacity (F/g)</b> | <b>Reference</b> |
|-------------------------------------------|------------------------|-----------------------|------------------|
| N-Doped Graphene Aerogel                  | 0.5 A/g                | 112.1 F/g             | S37              |
| N, P Co-Doped Graphene                    | 1 A/g                  | 416 F/g               | S38              |
| N, P co-doped Graphene                    | 0.25 A/g               | 202 F/g               | S39              |
| N/P codoped porous carbon-coated graphene | 0.5 A/g                | 134 F/g               | S40              |
| NS-PCMSs                                  | 0.1 A/g                | 271 F/g               | S41              |
| CNSs                                      | 0.5 A/g                | 227 F/g               | S42              |
| Carbon nanosheets                         | 1 A/g                  | 241 F/g               | S43              |
| Graphene-Based Porous Materials           | 1 A/g                  | 214 F/g               | S44              |
| All-In-One Flexible Graphene              | 2 mV/s                 | 237 F/cm <sup>3</sup> | S45              |
| Alkynyl Carbon Materials                  | 0.2 A/g                | 76 F/g                | S46              |
| Graphdiyne nanostructures                 | 5A/g                   | 41 F/g                | S47              |
| $\gamma$ -graphyne                        | 0.2 A/g                | 81 F/g                | S48              |
| <b>N-graphyne</b>                         | <b>1 A/g</b>           | <b>235 F/g</b>        | <b>This Work</b> |

**Table S3** The fitting results of EIS spectra

| <b>Electrodes</b> | $R_i(\Omega/\text{cm}^2)$ | CPE-T | CPE-P | $R_{ct}(\Omega/\text{cm}^2)$ |
|-------------------|---------------------------|-------|-------|------------------------------|
| GE                | 0.758                     | 0.414 | 0.760 | 1.208                        |
| GY                | 0.774                     | 0.277 | 0.823 | 0.393                        |
| N-GY              | 0.744                     | 0.332 | 0.778 | 0.357                        |

## References

- [S1] P. S. Menezes, C. D. Panda, C. Walter, M. Schwarze and M. Driess, *Adv. Funct. Mater.*, 2019, **29**, 1808632.
- [S2] H. J. Yan, Y. Xie, A. P. Wu, Z. C. Cai, L. Wang, C. G. Tian, X. M. Zhang and H. G. Fu, *Adv. Mater.*, 2019, **31**, 1901174.
- [S3] Z. Q. Xue, X. Li, Q. L. Liu, M. K. Cai, K. Kiu, M. Liu, Z. F. Ke, X. L. Liu and G. Q. Li, *Adv. Mater.*, 2019, **31**, 1900430.
- [S4] C. Hu, X. J. Wang, T. Yao, T. L. Gao, J. C. Han, X. H. Zhang, Y. M. Zhang, P. Xu and B. Song, *Adv. Funct. Mater.*, 2019, **29**, 1902449.
- [S5] Y. Y. Ning, D. D. Ma, Y. Shen, F. M. Wang and X. B. Zhang, *Electrochim. Acta*, 2018, **265**, 19-31.
- [S6] X. Zou, Y. P. Liu, G. D. Li, Y. Y. Wu, D. P. Liu, W. Li, H. W. Li, D. J. Wang, Y. Zhang and X. X. Zou, *Adv. Mater.*, 2017, **29**, 1700404.
- [S7] Y. Jia, L. Z. Zhang, G. P. Gao, H. Chen, B. Wang, J. Z. Zhou, M. T. Soo, M. Hong, X. C. Yan, G. R. Qian, J. Zou, A. J. Du and X. D. Yao, *Adv. Mater.*, 2017, **29**, 1700017.
- [S8] B. C. Weng, F. H. Xu, C. L. Wang, W. W. Meng, C. R. Grice, Y. F. Yan, *Energ. Environ. Sci.*, 2017, **10**, 121-128.
- [S9] J. Z. Li, G. D. Wei, Y. K. Zhu, Y. L. Xi, X. X. Pan, Y. Ji, I. V. Zatonovsky and W. Han, *J. Mater. Chem. A*, 2017, **5**, 14828-14837.
- [S10] H. F. Liang, A. N. Gandi, D. H. Anjum, X. B. Wang, U. Schwingenschlogl and H. N. Alshareef, *Nano Lett.*, 2016, **16**, 7718-7725.

- [S11] J. Yu, Q. Q. Li, C. Y. Xu, L. Zhen, V. P. Dravid and J. S. Wu, *Adv. Funct. Mater.*, 2016, **26**, 7644-7651.
- [S12] S.H. Ahn and A.G. Manthiram, *J. Mater. Chem. A*, 2017, **5**, 2496-2503.
- [S13] J. Wang, L. Y. Gan, W. Y. Zhang, Y. C. Peng, H. Yu, Q. Y. Yan, X. H. Xia and X. Wang, *Sci. Adv.*, 2018, **4**, 7970.
- [S14] T. Tang, W. J. Jiang, S. Niu, N. Liu, H. Luo, Y. Y. Chen, S. F. Jin, F. Gao, L. J. Wan and J. S. Hu, *J. Am. Chem. Soc.*, 2017, **139**, 8320-8328.
- [S15] H. Wang, J. H. Tang, Y. L. Li, H. Chu, Y. C. Ge, R. Baines, P. Dong, P. M. Ajayan, J. F. Shen, M. X. Ye, *J. Mater. Chem. A*, 2018, **6**, 19417-19424.
- [S16] Y. Yang, H. Q. Yao, Z. H. Yu, S. M. Islam, H. Y. He, M. W. Yuan, Y. H. Yue, K. Xu, W. C. Hao, G. B. Sun, H. F. Li, S. L. Ma, P. Zapol and M. G. Kannatzidis, *J. Am. Chem. Soc.*, 2019, **141**, 10417-10430.
- [S17] L. F. Lin, M. Chen and L. M. Wu, *ACS Appl. Energy Mater.*, 2019, **2**, 4737-4744.
- [S18] C. Cai, S. B. Han, Q. Wang and M. Gu, *ACS Nano*, 2019, **13**, 8865-8871.
- [S19] J. L. Liu, Z. Y. Wang, K. D. Su, D. Y. Xv, D. Zhao, J. H. Li, H. X. Tong, D. Qian, C. M. Yang and Z. G. Lu, *ACS Appl. Mater. Inter.*, 2019, **11**, 25854-25862.
- [S20] S. Q. Niu, Y. C. Sun, G. J. Sun, D. Rakov, Y. Z. Li, Y. Ma, J. Y. Chu and P. Xu, *ACS Appl. Energy Mater.*, 2019, **2**, 3927-3935.
- [S21] H. S. Han, J. W. Woo, Y. R. Hong, Y. C. Chung and S. W. Mhin, *ACS Appl. Energy Mater.*, 2019, **2**, 3999-4007.
- [S22] H. C. Tsai, B. Vedhanarayanan and T. W. Lin, *ACS Appl. Energy Mater.*, 2019,

**2**, 3708-3716.

[S23] A. P. Tiwari, Y. H. Yoon, T. G. Novak, K. S. An and S. Jeon, *ACS Appl. Nano Mater.*, 2019, **2**, 5061-5070.

[S24] C. Q. Li, G. Wang, K. Li, Y. W. Liu, B. B. Yuan and Y. Q. Lin, *ACS Appl. Mater. Interfaces*, 2019, **11**, 20778-20787.

[S25] S. Q. Niu, Y. C. Sun, G. J. Sun, D. Rakov, Y. Z. Li, Y. Ma, J. Y. Chu and P. Xu, *ACS Appl. Energy Mater.*, 2019, **2**, 3927-3935.

[S26] D. H. Song, J. W. Shin, Y. J. Lee, Y. K. Kwon, J. H. Lim, E. J. Kim, S. K. Oh, M. J. Kim and E. A. Cho, *ACS Appl. Energy Mater.*, 2019, **2**, 3452-3460.

[S27] S. Li, C. Xi, Y. Z. Jin, D. Y. Wu, J. Q. Wang, T. Liu, H. B. Wang, C. K. Dong, H. Liu, S. A. Kulinich and X. W. Du, *ACS Energy Lett.*, 2019, **4**, 1823-1829.

[S28] S. Y. Hao, L. C. Chen, C. L. Yu, B. Yang, Z. J. Li, Y. Hou, L. C. Lei and X. W. Zhang, *ACS Energy Lett.*, 2019, **4**, 952-959.

[S29] W. Gao, W. Y. Gou, Y. Y. Ma, R. J. Wei, J. C. Ho and Y. Q. Qu, *ACS Appl. Energy Mater.*, 2019, **2**, 5769-5776.

[S30] D. C. Nguyen, D. T. Tran, T. L. L. Doan, N. H. Kim, J. H. Lee, *Chem. Mater.*, 2019, **31**, 2892-2904.

[S31] Z. X. Yin, Y. Sun, Y. J. Jiang, F. Yan, C. L. Zhu and Y. J. Chen, *ACS Appl. Mater. Inter.*, 2019, **11**, 27751-27759.

[S32] B. W. Zhang, K. Jiang, H. T. Wang and S. Hu, *Nano Lett.*, 2019, **19**, 530-537.

[S33] C. C. Liu, D. B. Jia, Q. Y. Hao, X. R. Zheng, Y. Li, C. C. Tang, H. Liu, J. Zhang and X. L. Zheng, *ACS Appl. Mater. Inter.*, 2019, **11**, 27667-27676.

- [S34] N. A. Khan, N. Rashid, M. Junaid, M. N. Zafar, M. Faheem and I. Ahmad, *ACS Appl. Energy Mater.*, 2019, **2**, 3587-3594.
- [S35] M. P. Suryawanshi, U. C. Ghorpade, S. W. Shin, U. P. Suyawanshi, E. Jo and J. H. Kim, *ACS Catal.*, 2019, **9**, 5025-5034.
- [S36] Q. D. Li, L. L. Wu, C. F. Yang, H. Wang and X. L. Cui, *J. Mater. Chem. A*, 2019, **11**, 5981-5990.
- [S37] N. Ma, S. Kosasang, N. Phattharasupakun, J. Wutthiprom, P. Chiochan, M. Suksomboon and M. Sawangphruk, *ECS Trans.*, 2018, **85**, 419-434.
- [S38] H. H. Cheng, F. Y. Yi, A. M. Gao, H. F. Liang, D. Shu, X. P. Zhou, C. He and Z. H. Zhu, *ACS Appl. Energy Mater.*, 2019, **2**, 4084-4091.
- [S39] K. S. Xia, Z. Y. Huang, L. Zheng, B. Han, Q. Gao, C. G. Zhou, H. Q. Wang and J. P. Wu, *J. Power Sources*, 2017, **365**, 380-388.
- [S40] L. Zheng, K. S. Xia, B. Han, C. G. Zhou, Q. Gao, H. Q. Wang, S. Pu and J. P. Wu, *ACS Appl. Nano Mater.*, 2018, **1**, 6742-6751.
- [S41] J. C. Zhang, J. S. Zhou, D. Wang, L. Hou and F. Gao, *Electrochim. Acta*, 2016, **191**, 933-939.
- [S42] T. Y. Wei, X. L. Wei, L. W. Yang, H. P. Xiao, Y. Gao and H. M. Li, *J. Power Sources*, 2016, **331**, 373-381.
- [S43] B. Liu, M. Yang, H. B. Chen, Y. J. Liu, D. G. Yang and H. M. Li, *J. Power Sources*, 2018, **397**, 1-10.
- [S44] F. Zhang, Y. H. Lu, X. Yang, L. Zhang, T. F. Zhang, K. Leng, Y. P. Wu, Y. Huang, Y. F. Ma and Y. S. Chen, *Small*, 2014, **11**, 2285-2292.

[S45] J. M. Du, C. Zheng, W. Lv, T. Q. Deng and Z. Z. Pan, *Adv. Mater. Inter.*, 2017, **11**, 1700004.

[S46] Y. J Li, Q. N. Liu, W. F. Li, H. Meng, Y.Z. Lu and C.X. Li, *ACS Appl. Mater. Inter.*, 2017, **9**, 3895-3901.

[S47] K. Krishnamoorthy, S. Thangavel, J. C. Veetil, N. Raju, G. Venugopal and S. J. Kim, *Int. J Hydrogen Energ.*, 2016, **41**, 1672-1678.

[S48] W. Ding, M. X. Sun, Z. H. Zhang, X. J. Lin and B. W. Gao, *Ultrason. Sonochem.*, 2020, **61**, 104850.
